# Supplementary material for: A mediator-free enzyme carbonaceous cathode for bioelectrocatalytic reduction of furfural to furfuryl alcohol
Source: Royal Society of Chemistry journal article supplement (doi:10.1039/d5gc00168d), 2025-01-01
Supplement: d5gc00168d1.pdf [file d5gc00168d1.pdf]

## Supplementary Information

A mediator-free enzymatic carbonaceous cathode for bioelectrocatalysis reduction of furfural into furfuryl alcohol

Shize Zheng <sup>1</sup>, Chenxi Zhang <sup>2,3</sup>, Peng Zhan <sup>2</sup>, Xiangshi Liu <sup>2</sup>, Houchao Shan <sup>4</sup>, Yong Wang <sup>5</sup>, Bin Wang <sup>3,\*</sup>, Peiyong Qin <sup>1,3</sup>, Di Cai <sup>2,\*</sup>, Tianwei Tan <sup>2,3</sup>

<sup>1</sup> Paris Curie Engineer School, Beijing University of Chemical Technology, Beijing University of Chemical Technology, Beijing 100029, China

<sup>2</sup> National Energy R&D Center for Biorefinery, Beijing University of Chemical Technology, Beijing 100029, China

<sup>3</sup> College of Life Science and Technology, Beijing University of Chemical Technology, Beijing 100029, China

<sup>4</sup> Hebei Key Laboratory of Applied Chemistry, College of Environment and Chemical Engineering, Yanshan University, Qinhuangdao 066004, China

<sup>5</sup> Fermentation Technology Innovation Center of Hebei Province, College of Food Science and Biology, Hebei University of Science and Technology, Shijiazhuang, 050018, China

Corresponding authors

E-mail: wangbin@mail.buct.edu.cn (B. Wang); caidibuct@163.com (D. Cai)

## Assay

The ADH loading on the synthesized TpBD@ADH capsules were calculated by ICP-OES based on Zn mole ratios, according to the following equation:

$$ADH \text{ Loading} = \frac{\text{mole of ADH}}{\text{mole of TpBD}} \times 100\% \quad (1)$$

As for the analysis of the electroenzymatic catalysis products, a high-performance liquid chromatography (HPLC) that was equipped with an ultraviolet (UV) detector (230 nm) was used to analyze the furfural and furfuryl alcohol concentrations in reactants. The mobile phase was consisted of 55 % (v/v) acetonitrile and 45 % (v/v) ultrapure water, and the flow rate of the mobile phase was 0.5 mL min<sup>-1</sup>. The furfural conversion and selectivity can be calculated by the following equations:

$$Conversion (\%) = \frac{n_0 - n_{furfural}}{n_0} \times 100\% \quad (2)$$

$$Selectivity (\%) = \frac{n_{furfuryl \text{ alcohol}}}{n_0 - n_{furfural}} \times 100\% \quad (3)$$

where  $n_0$  refers to the initial concentration of furfural,  $n_{furfural}$  is the furfural concentration after reaction, and  $n_{furfuryl \text{ alcohol}}$  stands for the furfuryl alcohol concentration.

## Tables

**Table S1.** ADH immobilization rate determined by ICP-OES.

| Sample name | ADH immobilization rate (%) |
|-------------|-----------------------------|
| TpBD@ADH-1  | 2.32±0.14                   |
| TpBD@ADH-2  | 2.48±0.11                   |
| TpBD@ADH-3  | 3.42±0.06                   |
| TpBD@ADH-4  | 6.18±0.09                   |
| TpBD@ADH-5  | 9.07±0.03                   |

**Table S2.** BET Surface areas and pore sizes of the nanoparticles.

| Sample name                | Surface Area (m <sup>2</sup> g <sup>-1</sup> ) | Pore size (nm) |
|----------------------------|------------------------------------------------|----------------|
| TpBD Capsules              | 14.4239                                        | 7.4929         |
| TpBD@ADH@CaCO <sub>3</sub> | 3.8834                                         | 2.3552         |
| TpBD@ADH                   | 30.4244                                        | 2.1398         |

## Figures

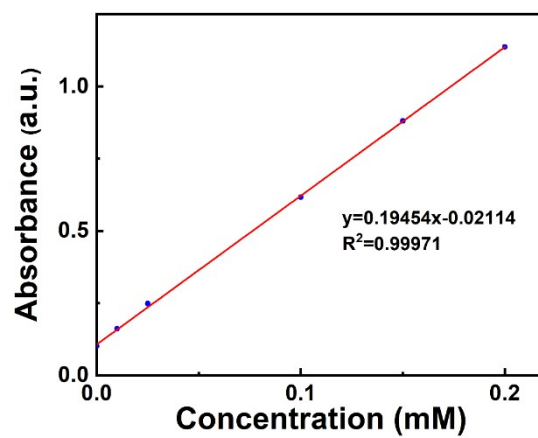

**Fig.S1** UV-vis standard curve of NADH at 340 nm.

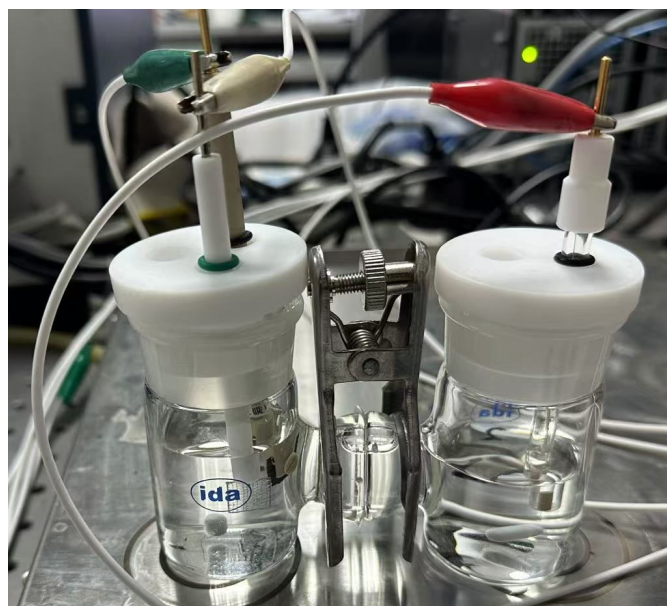

**Fig.S2** H-cell used in the electroenzymatic furfural reduction.

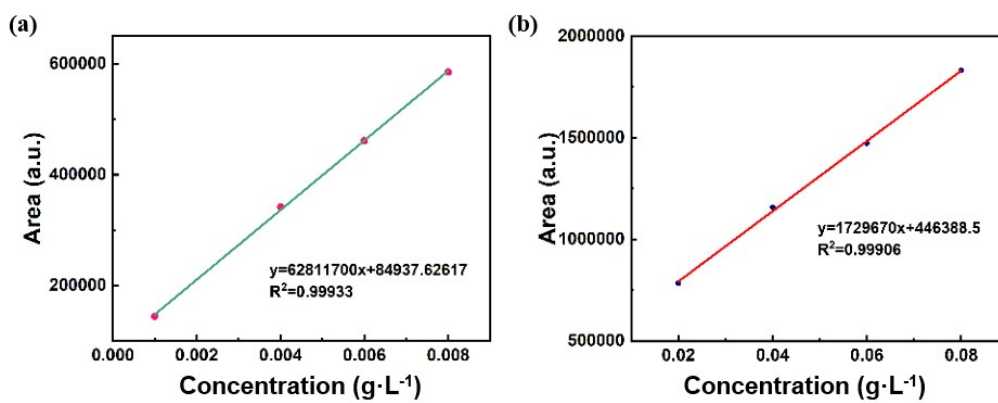

**Fig.S3** HPLC standard curves of (a) furfuryl alcohol and (b) furfural.

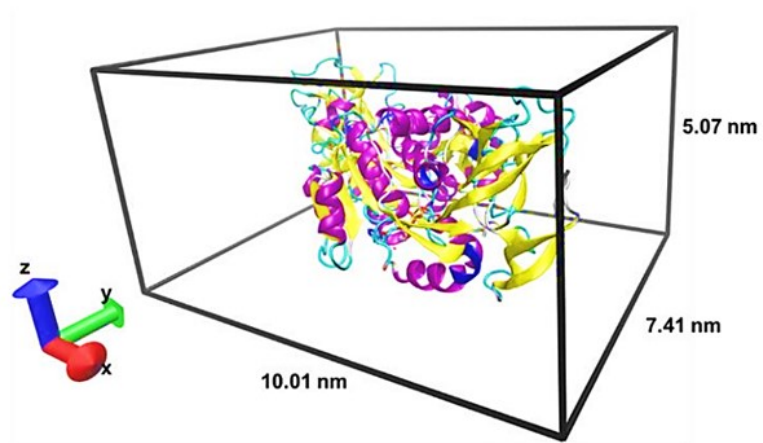

**Fig.S4** Spatial size of ADH by molecular docking simulations.



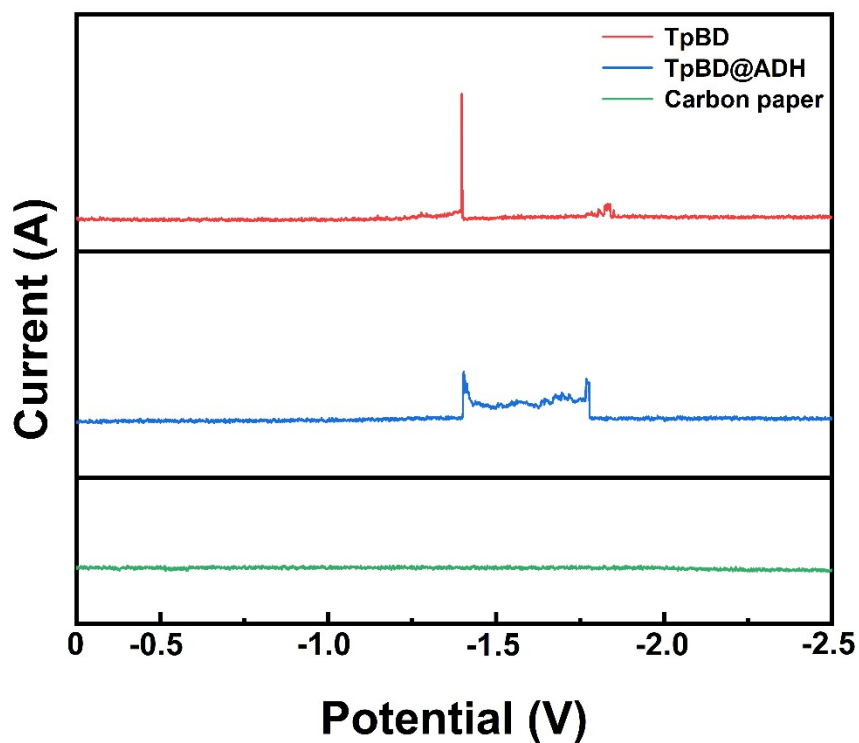

Fig.S5 LSV test of different electrode.

The LSV test of different electrode was performed in a cell. The reaction was conducted at room temperature ( $\sim 25^{\circ}\text{C}$ ) with an external CHI760E workstation (CH Instruments, Shanghai, China). TpBD@ADH electrode ( $1.0 \times 1.0 \text{ cm}^2$ ) was served as the working electrode. An Ag/AgCl (3.5 M KCl) electrode was used as the reference electrode, and a platinum mesh was equipped as the counter electrode. The electrolyte was 30 mL 0.1 M PBS buffer added 5 mM  $\text{NAD}^+$  and 0.5 mM furfural. In the presence of  $\text{NAD}^+$ , linear sweep voltammetry (LSV) curves were obtained over a potential range of 0 V to -2.5 V vs. Ag/AgCl at a scan rate of  $20 \text{ mV s}^{-1}$ .
